# Supplementary material for: Rapid Biophysical Characterization and NMR Spectroscopy Structural Analysis of Small Proteins from Bacteria and Archaea
Source: PubMed Central journal article supplement (PMC7217052; doi:10.1002/cbic.201900677), 2020-01-21
Supplement: CBIC-21-1178-s001.pdf [file CBIC-21-1178-s001.pdf]

## Supporting Information

### **Rapid Biophysical Characterization and NMR Spectroscopy Structural Analysis of Small Proteins from Bacteria and Archaea**

Nina Kubatova,<sup>[a]</sup> Dennis J. Pyper,<sup>[a]</sup> Hendrik R. A. Jonker,<sup>[a]</sup> Krishna Saxena,<sup>[a]</sup> Laura Rimmel,<sup>[a]</sup>  
Christian Richter,<sup>[a]</sup> Sabine Brantl,<sup>[b]</sup> Elena Evguenieva-Hackenberg,<sup>[c]</sup> Wolfgang R. Hess,<sup>[d]</sup>  
Gabriele Klug,<sup>[c]</sup> Anita Marchfelder,<sup>[e]</sup> Jörg Soppa,<sup>[f]</sup> Wolfgang Streit,<sup>[g]</sup> Maxim Mayzel,<sup>[h]</sup>  
Vladislav Y. Orekhov,<sup>[h, k]</sup> Monika Fuxreiter,<sup>[i]</sup> Ruth A. Schmitz,<sup>\*,[j]</sup> and Harald Schwalbe<sup>\*,[a]</sup>

cbic\_201900677\_sm\_miscellaneous\_information.pdf

# Supporting Information

## Table of contents

|                                                                                                                         |    |
|-------------------------------------------------------------------------------------------------------------------------|----|
| Table S1 A. Overview of the amino acid sequences of small proteins screened in this study.....                          | 2  |
| Table S1 B. Overview of the origin of small proteins screened in this study. ....                                       | 3  |
| Table S1 C. Overview of the results of structural analysis of small proteins screened in this study. ....               | 4  |
| Table S1 D. Classification of small protein origin screened in this study. ....                                         | 5  |
| Table S2. S2D NMR chemical shift based statistical population prediction of small proteins screened in this study. .... | 6  |
| Table S3. Meta prediction approach of small proteins based on a combination of predictors.....                          | 7  |
| Table S4. EspritZ NMR predictions of small proteins screened in this study. ....                                        | 8  |
| Figure S1. Sequence-based SWISS model secondary structure predictions of small proteins .....                           | 9  |
| Figure S2. Titration series of 2D $^1\text{H}^{15}\text{N}$ -HSQC spectra of SP-23 high salt regulated protein. ....    | 10 |
| Figure S3. Temperature series of 2D $^1\text{H}^{15}\text{N}$ -HSQC spectra of SP-21 high zinc-binding protein. ....    | 11 |
| Figure S4. FLYA assignment of SP-22 protein.....                                                                        | 12 |
| Figure S5: Progress of targeted acquisition against measurement time of SP-22 small protein.....                        | 13 |
| Reference .....                                                                                                         | 14 |

**Table S1 A. Overview of the amino acid sequences of small proteins screened in this study.**  
The small proteins are shown according to ascending molecular weight.

| ID    | aa | MW, kDa | Sequence                                                                      |
|-------|----|---------|-------------------------------------------------------------------------------|
| SP-1  | 14 | 1.6     | VSYLKRCHLAGIAR                                                                |
| SP-2  | 14 | 1.8     | MANTQNISIWWWAR                                                                |
| SP-3  | 18 | 1.9     | VSKKVLERGVGTTEARL                                                             |
| SP-4  | 18 | 2.2     | MLVRDLEQLLFKINLLSR                                                            |
| SP-5  | 23 | 2.6     | LDSNTSHKNSVRHVLGLAQRVSF                                                       |
| SP-6  | 23 | 2.8     | VPVMKNLADSMSPMSSEARKLS                                                        |
| SP-7  | 27 | 2.9     | VSRGLREGCRFSRHSASHESMPGGSHS                                                   |
| SP-8  | 28 | 3.1     | MEEVNQIAGGHPTLKDGVCFGPPARLFW                                                  |
| SP-9  | 29 | 3.1     | LKIAMGAGLTESRAKEAFKASKKKVAEIV                                                 |
| SP-10 | 31 | 3.7     | MRPKHRRRASLFRCKNMQECADGMAMVMIK                                                |
| SP-11 | 38 | 4.0     | MVSMRSCMCCGEPISETRHLGVCIQNGCTSYADACGQ                                         |
| SP-12 | 39 | 4.5     | VNLMCTIAKERLQRDHWEQQAQDSVGGQEAADKKTPTA                                        |
| SP-13 | 43 | 4.8     | MRDTAMSQRKDDHLDIVLDERTAPATVAAGRECIRFELSSDGD                                   |
| SP-14 | 45 | 5.1     | MLVMPTIDVSEHLYRQIESAADGEDLDAAMWKMVGRYQRGNTPGD                                 |
| SP-15 | 46 | 5.1     | MASDAPDGKFRSFIGRFRSQRTRLRVSACVAASRSIAVPDDDEHAE                                |
| SP-16 | 46 | 4.9     | MSDDSNQMVTYLRQNPRMMGVLFLLTLLLSQAGSVAAGNTGHIYGP                                |
| SP-17 | 48 | 5.5     | MKLEMLQDLMQYFTEAFARVFGPSDDEYPAVGVQPFDEILVNSTEE                                |
| SP-18 | 51 | 5.5     | MNFSVVVGPRGNQHKSESGGSCRILQGSRLERVGRCVASRLPLQTRRPPCVL                          |
| SP-19 | 51 | 5.7     | MVLHNSVIDDYHPTEGYEYECRSCRTRTVSASHLSECPDCGGSVRNIAVARE                          |
| SP-20 | 53 | 6.2     | MGWIEGRDLRIGTQPLPSTSKLNFRNITSFSLFWLNPIPSTCTFIRVYIDFC                          |
| SP-21 | 59 | 6.5     | MSESEQRHAHQCVSCGINIAGMSAATFKCPDCGQEISRCSKCRKQSNLYECPDCGFMGP                   |
| SP-22 | 60 | 6.7     | MNKAHFEVFDAAADKYRWRLVHDNGNILADSGEGYASKQKAKQGIESVKNAPDADVIEA                   |
| SP-23 | 61 | 6.9     | MSSSPWTANFATEKSKCAADVQRLEKYPQPVVYEVMSSELLRQEMREQFAGAYAASQQSDD                 |
| SP-24 | 61 | 7.1     | VTIWEYDVKEIRFSEWSKAKEDLNNLGVEGWELIKFSNEIDENGMVAAVFKRPVDYVDAAF                 |
| SP-25 | 61 | 7.2     | MERVTLRIPKQIEEVERMVETGEFPNRSEAIRSAVRDMLNEQVTDKRQRESTSKRGWAKV                  |
| SP-26 | 70 | 7.7     | MAAFETTRPAPFGAISTFHFVQRMSDLLATVVAVNDARATRAALSKLSDRELDIGLCRGDIDDICALRR         |
| SP-27 | 78 | 8.1     | MVYAYVMVKAAPVSDGIDQLKQDLLAVSDGIVSAHIVAGDVFIVKVEVDSPADVKGIAGGIQSVAGIEDTQTYIAMD |

**Table S1 B. Overview of the origin of small proteins screened in this study.** The small proteins are shown according to ascending molecular weight.

| <b>ID</b>    | <b>collaborative ID</b> | <b>MW, kDa</b> | <b>Microorganism</b>              | <b>Research group</b>       | <b>University</b> |
|--------------|-------------------------|----------------|-----------------------------------|-----------------------------|-------------------|
| <b>SP-1</b>  | rreB                    | 1.6            | <i>Bradyrhizobium japonicum</i>   | Elena Evguenieva-Hackenberg | Giessen           |
| <b>SP-2</b>  | TrpL leader             | 1.8            | <i>Sinorhizobium meliloti</i>     | Elena Evguenieva-Hackenberg | Giessen           |
| <b>SP-3</b>  | rreR                    | 1.9            | <i>Dinoroseobacter shibae</i>     | Elena Evguenieva-Hackenberg | Giessen           |
| <b>SP-4</b>  | SP34_2_WW               | 2.2            | <i>Methanosarcina mazei</i>       | Ruth Schmitz                | Kiel              |
| <b>SP-5</b>  | sP44                    | 2.6            | <i>Methanosarcina mazei</i>       | Ruth Schmitz                | Kiel              |
| <b>SP-6</b>  | SP26_1_SW               | 2.8            | <i>Methanosarcina mazei</i>       | Ruth Schmitz                | Kiel              |
| <b>SP-7</b>  | na                      | 2.9            | <i>Sinorhizobium meliloti</i>     | Elena Evguenieva-Hackenberg | Giessen           |
| <b>SP-8</b>  | sPP37                   | 3.1            | <i>Methanosarcina mazei</i>       | Ruth Schmitz                | Kiel              |
| <b>SP-9</b>  | sPP31                   | 3.1            | <i>Methanosarcina mazei</i>       | Ruth Schmitz                | Kiel              |
| <b>SP-10</b> | NGR_c15640              | 3.7            | <i>Sinorhizobium fredii</i>       | Wolfgang Streit             | Hamburg           |
| <b>SP-11</b> | HVO_2983_A              | 4.0            | <i>Haloferax volcanii</i>         | Jörg Soppa                  | Frankfurt am Main |
| <b>SP-12</b> | SPR2360                 | 4.5            | <i>Bacillus subtilis</i>          | Sabine Brantl               | Jena              |
| <b>SP-13</b> | NGR_a02780              | 4.8            | <i>Sinorhizobium fredii</i>       | Wolfgang Streit             | Hamburg           |
| <b>SP-14</b> | HVO_1270                | 4.9            | <i>Haloferax volcanii</i>         | Anita Marchfelder           | Ulm               |
| <b>SP-15</b> | HVO_1796                | 5.1            | <i>Haloferax volcanii</i>         | Anita Marchfelder           | Ulm               |
| <b>SP-16</b> | HVO_2354                | 5.1            | <i>Haloferax volcanii</i>         | Anita Marchfelder           | Ulm               |
| <b>SP-17</b> | Norf1 6803              | 5.5            | <i>Synechocystis</i> sp. PCC 6803 | Wolfgang R. Hess            | Freiburg          |
| <b>SP-18</b> | repX                    | 5.5            | <i>Sinorhizobium fredii</i>       | Wolfgang Streit             | Hamburg           |
| <b>SP-19</b> | HVO_1533                | 5.7            | <i>Haloferax volcanii</i>         | Anita Marchfelder           | Ulm               |
| <b>SP-20</b> | sP41                    | 6.2            | <i>Methanosarcina mazei</i>       | Ruth Schmitz                | Kiel              |
| <b>SP-21</b> | HVO_2753                | 6.5            | <i>Haloferax volcanii</i>         | Jörg Soppa                  | Frankfurt am Main |
| <b>SP-22</b> | HVO_2922                | 6.7            | <i>Haloferax volcanii</i>         | Anita Marchfelder           | Ulm               |
| <b>SP-23</b> | A0101                   | 6.9            | <i>Haloferax volcanii</i>         | Anita Marchfelder           | Ulm               |
| <b>SP-24</b> | sP36                    | 7.1            | <i>Methanosarcina mazei</i>       | Ruth Schmitz                | Kiel              |
| <b>SP-25</b> | HVO_0582                | 7.2            | <i>Haloferax volcanii</i>         | Anita Marchfelder           | Ulm               |
| <b>SP-26</b> | RSP_0557                | 7.7            | <i>Rhodobacter sphaeroides</i>    | Gabriele Klug               | Giessen           |
| <b>SP-27</b> | HVO_2212                | 8.1            | <i>Haloferax volcanii</i>         | Anita Marchfelder           | Ulm               |

**Table S1 C. Overview of the results of structural analysis of small proteins screened in this study.** The small proteins are shown according to ascending molecular weight.

| <b>ID</b> | <b>aa</b> | <b>MW ,kDa</b> | <b>SPPS/Expression</b> | <b>Structural analysis</b>    |
|-----------|-----------|----------------|------------------------|-------------------------------|
| SP-1      | 14        | 1.6            | SPPS                   | unstructured <sup>[1]</sup>   |
| SP-2      | 14        | 1.8            | SPPS                   | unstructured                  |
| SP-3      | 18        | 1.9            | SPPS                   | unstructured <sup>[1]</sup>   |
| SP-4      | 18        | 2.2            | SPPS                   | n.a. due to hydrophobicity    |
| SP-5      | 23        | 2.6            | SPPS                   | unstructured                  |
| SP-6      | 23        | 2.8            | SPPS                   | unstructured                  |
| SP-7      | 27        | 2.9            | SPPS                   | unstructured                  |
| SP-8      | 28        | 3.1            | SPPS                   | unstructured                  |
| SP-9      | 29        | 3.1            | SPPS                   | unstructured                  |
| SP-10     | 31        | 3.7            | SPPS                   | molten globule <sup>[2]</sup> |
| SP-11     | 38        | 4.0            | Expression             | molten globule                |
| SP-12     | 39        | 4.5            | Expression             | molten globule                |
| SP-13     | 43        | 4.8            | Expression             | molten globule <sup>[2]</sup> |
| SP-14     | 46        | 4.9            | Expression             | no expression                 |
| SP-15     | 46        | 5.1            | Expression             | no expression                 |
| SP-16     | 45        | 5.1            | Expression             | degradation                   |
| SP-17     | 48        | 5.5            | Expression             | no expression                 |
| SP-18     | 51        | 5.5            | Expression             | degradation                   |
| SP-19     | 51        | 5.7            | Expression             | structured                    |
| SP-20     | 53        | 6.2            | Expression             | degradation                   |
| SP-21     | 59        | 6.5            | Expression             | structured                    |
| SP-22     | 60        | 6.7            | Expression             | structured <sup>[3]</sup>     |
| SP-23     | 61        | 6.9            | Expression             | molten globule                |
| SP-24     | 61        | 7.1            | Expression             | structured                    |
| SP-25     | 61        | 7.2            | Expression             | molten globule                |
| SP-26     | 70        | 7.7            | Expression             | degradation                   |
| SP-27     | 78        | 8.1            | Expression             | partially structured          |

**Table S1 D. Classification of small protein origin screened in this study.**

| <b>Species</b>                   | <b>Kingdom</b> | <b>Phylum</b>  | <b>Class</b>         | <b>Order</b>      | <b>Family</b>             | <b>Genus</b>           |
|----------------------------------|----------------|----------------|----------------------|-------------------|---------------------------|------------------------|
| <i>Dinoroseobacter shibae</i>    | Bacteria       | Proteobacteria | Alpha proteobacteria | Rhodobacterales   | <i>Rhodobacteraceae</i>   | <i>Dinoroseobacter</i> |
| <i>Rhodobacter sphaeroides</i>   | Bacteria       | Proteobacteria | Alpha proteobacteria | Rhodobacterales   | <i>Rhodobacteraceae</i>   | <i>Rhodobacter</i>     |
| <i>Sinorhizobium meliloti</i>    | Bacteria       | Proteobacteria | Alpha proteobacteria | Rhizobiales       | <i>Rhizobiaceae</i>       | <i>Sinorhizobium</i>   |
| <i>Sinorhizobium fredii</i>      | Bacteria       | Proteobacteria | Alpha proteobacteria | Rhizobiales       | <i>Rhizobiaceae</i>       | <i>Sinorhizobium</i>   |
| <i>Bradyrhizobium japonicum</i>  | Bacteria       | Proteobacteria | Alpha proteobacteria | Rhizobiales       | <i>Bradyrhizobiaceae</i>  | <i>Bradyrhizobium</i>  |
| <i>Bacillus subtilis</i>         | Bacteria       | Firmicutes     | Bacilli              | Bacillales        | <i>Bacillaceae</i>        | <i>Bacillus</i>        |
| <i>Synechocystis</i> sp.PCC 6803 | Bacteria       | Cyanobacteria  |                      | Chroococcales     | <i>Merismopediaceae</i>   | <i>Synechocystis</i>   |
| <i>Methanosarcina mazei</i>      | Archaea        | Euryarchaeota  | Methanomicrobia      | Methanosarcinales | <i>Methanosarcinaceae</i> | <i>Methanosarcina</i>  |
| <i>Haloferax volcanii</i>        | Archaea        | Euryarchaeota  | Halobacteria         | Halobacteriales   | <i>Halobacteriaceae</i>   | <i>Haloferax</i>       |

**Table S2. S2D NMR chemical shift based statistical population prediction of small proteins screened in this study.** <sup>[4][5]</sup> Small proteins are combined in classes with respect to experimental secondary structure screening analysis.

|                       | <b>ID</b>    | <b>aa</b> | <b>helix</b> | <b>coil</b> | <b>extended</b> |
|-----------------------|--------------|-----------|--------------|-------------|-----------------|
| <b>folded</b>         | <b>SP-19</b> | 51        | 0            | <b>1</b>    | 0               |
|                       | <b>SP-21</b> | 59        | 0            | <b>0.95</b> | 0.05            |
|                       | <b>SP-22</b> | 60        | 0.23         | 0.48        | 0.28            |
|                       | <b>SP-24</b> | 61        | 0.13         | <b>0.66</b> | 0.21            |
|                       | <b>SP-27</b> | 78        | 0.33         | 0.30        | 0.37            |
| <b>molten globule</b> | <b>SP-10</b> | 31        | 0.32         | <b>0.64</b> | 0.03            |
|                       | <b>SP-11</b> | 38        | 0.29         | <b>0.71</b> | 0               |
|                       | <b>SP-12</b> | 39        | 0.33         | <b>0.67</b> | 0               |
|                       | <b>SP-13</b> | 43        | 0            | <b>0.86</b> | 0.14            |
|                       | <b>SP-23</b> | 61        | <b>0.71</b>  | 0.29        | 0               |
|                       | <b>SP-25</b> | 61        | 0.53         | 0.38        | 0.09            |
| <b>unstructured</b>   | <b>SP-8</b>  | 28        | 0            | <b>1</b>    | 0               |
|                       | <b>SP-9</b>  | 29        | <b>0.62</b>  | 0.38        | 0               |
| <b>degradation</b>    | <b>SP-16</b> | 45        | 0.44         | <b>0.56</b> | 0               |
|                       | <b>SP-18</b> | 51        | 0.31         | <b>0.61</b> | 0.08            |
|                       | <b>SP-26</b> | 70        | <b>0.56</b>  | 0.44        | 0               |
| <b>not expressed</b>  | <b>SP-14</b> | 46        | <b>0.59</b>  | 0.41        | 0               |
|                       | <b>SP-15</b> | 46        | 0.09         | <b>0.91</b> | 0               |
|                       | <b>SP-17</b> | 48        | 0.40         | <b>0.60</b> | 0               |

**Table S3. Meta prediction approach of small proteins based on a combination of predictors** (PrDOS, DisoPred2, VSL2, IUPred) <sup>[6]</sup>. Dynamic transition induced by interactions was commutated with FuzPred with a reference to metaPrDos free form. Small proteins are combined in classes with respect to experimental secondary structure screening analysis.

|                | ID    | aa | Free form   |             | Bound form  |             |
|----------------|-------|----|-------------|-------------|-------------|-------------|
|                |       |    | structured  | disordered  | structured  | disordered  |
| folded         | SP-19 | 51 | <b>74.5</b> | 25.5        | <b>92.2</b> | 7.8         |
|                | SP-21 | 59 | <b>78</b>   | 22          | <b>84.7</b> | 15.3        |
|                | SP-22 | 60 | <b>75</b>   | 25          | <b>93.3</b> | 6.7         |
|                | SP-24 | 61 | <b>90.2</b> | 9.8         | <b>100</b>  | 0           |
|                | SP-27 | 78 | <b>96.2</b> | 3.8         | <b>100</b>  | 0           |
| molten globule | SP-10 | 31 | <b>71</b>   | 29          | <b>96.8</b> | 3.2         |
|                | SP-11 | 38 | <b>81.6</b> | 18.4        | <b>97.4</b> | 2.6         |
|                | SP-12 | 39 | 41          | <b>59</b>   | <b>64.1</b> | 35.9        |
|                | SP-13 | 43 | <b>62.8</b> | 37.2        | <b>74.4</b> | 25.6        |
|                | SP-23 | 61 | <b>68.9</b> | 31.1        | <b>75.4</b> | 24.6        |
|                | SP-25 | 61 | 24.6        | <b>75.4</b> | <b>70.5</b> | 29.5        |
| unstructured   | SP-1  | 14 | <b>64.3</b> | 35.7        | <b>92.9</b> | 7.1         |
|                | SP-2  | 14 | <b>71.4</b> | 28.6        | <b>92.9</b> | 7.1         |
|                | SP-3  | 18 | 0           | <b>100</b>  | 5.6         | <b>94.4</b> |
|                | SP-5  | 23 | 8.7         | <b>91.3</b> | <b>69.6</b> | 30.4        |
|                | SP-6  | 23 | 0           | <b>100</b>  | 30.4        | <b>69.6</b> |
|                | SP-7  | 27 | 0           | <b>100</b>  | 33.3        | <b>66.7</b> |
|                | SP-8  | 28 | <b>64.3</b> | 35.7        | <b>100</b>  | 0           |
|                | SP-9  | 29 | 9.4         | <b>90.6</b> | <b>93.1</b> | 6.9         |
| degradation    | SP-16 | 45 | <b>73.3</b> | 26.7        | <b>95.6</b> | 4.4         |
|                | SP-18 | 51 | 41.2        | <b>58.8</b> | <b>98</b>   | 2           |
|                | SP-20 | 53 | <b>88.5</b> | 11.5        | <b>88.5</b> | 11.5        |
|                | SP-26 | 70 | <b>77.1</b> | 22.9        | <b>91.4</b> | 8.6         |
| not expressed  | SP-4  | 18 | <b>83.3</b> | 16.7        | <b>100</b>  | 0           |
|                | SP-14 | 46 | <b>71.7</b> | 28.3        | <b>84.8</b> | 15.2        |
|                | SP-15 | 46 | <b>50</b>   | <b>50</b>   | <b>73.9</b> | 26.1        |
|                | SP-17 | 48 | <b>72.9</b> | 27.1        | <b>87.5</b> | 12.5        |



**Table S4. Espritz NMR predictions of small proteins screened in this study.** <sup>[7]</sup> Dynamic transition induced by interactions was computed by the FuzPred <sup>[8]</sup> method with a reference to Espritz NMR free form. Small proteins are combined in classes with respect to experimental secondary structure screening analysis.

|                | ID    | aa | Free form   |             | Bound form  |             |
|----------------|-------|----|-------------|-------------|-------------|-------------|
|                |       |    | structured  | disordered  | structured  | disordered  |
| folded         | SP-19 | 51 | <b>68.6</b> | 31.4        | <b>92.2</b> | 7.8         |
|                | SP-21 | 59 | <b>71.2</b> | 28.8        | <b>84.7</b> | 15.3        |
|                | SP-22 | 60 | <b>73.3</b> | 26.7        | <b>100</b>  | 0           |
|                | SP-24 | 61 | <b>100</b>  | 0           | <b>100</b>  | 0           |
|                | SP-27 | 78 | <b>100</b>  | 0           | <b>100</b>  | 0           |
| molten globule | SP-10 | 31 | <b>61.3</b> | 38.8        | <b>93.5</b> | 6.5         |
|                | SP-11 | 38 | <b>73.7</b> | 26.4        | <b>100</b>  | 0           |
|                | SP-12 | 39 | 20.5        | <b>79.4</b> | <b>41</b>   | 59          |
|                | SP-13 | 43 | <b>53.5</b> | <b>46.5</b> | <b>67.4</b> | 32.6        |
|                | SP-23 | 61 | <b>67.2</b> | 32.8        | <b>78.7</b> | 21.3        |
|                | SP-25 | 61 | 19.7        | <b>80.4</b> | <b>75.4</b> | 24.6        |
| unstructured   | SP-1  | 14 | <b>78.6</b> | 21.4        | <b>100</b>  | 0           |
|                | SP-2  | 14 | 21.4        | <b>78.6</b> | <b>78.6</b> | 21.4        |
|                | SP-3  | 18 | 0           | <b>100</b>  | <b>61.1</b> | 38.9        |
|                | SP-5  | 23 | 21.7        | <b>78.2</b> | <b>87</b>   | 13          |
|                | SP-6  | 23 | 0           | <b>100</b>  | <b>52.2</b> | <b>47.8</b> |
|                | SP-7  | 27 | 0           | <b>100</b>  | <b>63</b>   | 37          |
|                | SP-8  | 28 | 0           | <b>100</b>  | <b>57.1</b> | <b>42.9</b> |
|                | SP-9  | 29 | <b>79.3</b> | 20.7        | <b>100</b>  | 0           |
| degradation    | SP-16 | 45 | <b>62.2</b> | 37.8        | <b>95.6</b> | 4.4         |
|                | SP-18 | 51 | 31.4        | <b>68.7</b> | <b>82.4</b> | 17.6        |
|                | SP-20 | 53 | <b>73.1</b> | 26.9        | <b>92.3</b> | 7.7         |
|                | SP-26 | 70 | <b>81.4</b> | 18.6        | <b>87.1</b> | 12.9        |
| not expressed  | SP-4  | 18 | <b>88.9</b> | 11.1        | <b>100</b>  | 0           |
|                | SP-14 | 46 | 28.3        | <b>71.8</b> | <b>82.6</b> | 17.4        |
|                | SP-15 | 46 | <b>47.8</b> | <b>52.2</b> | <b>71.7</b> | 28.3        |
|                | SP-17 | 48 | <b>66.7</b> | 33.3        | <b>97.9</b> | 2.1         |

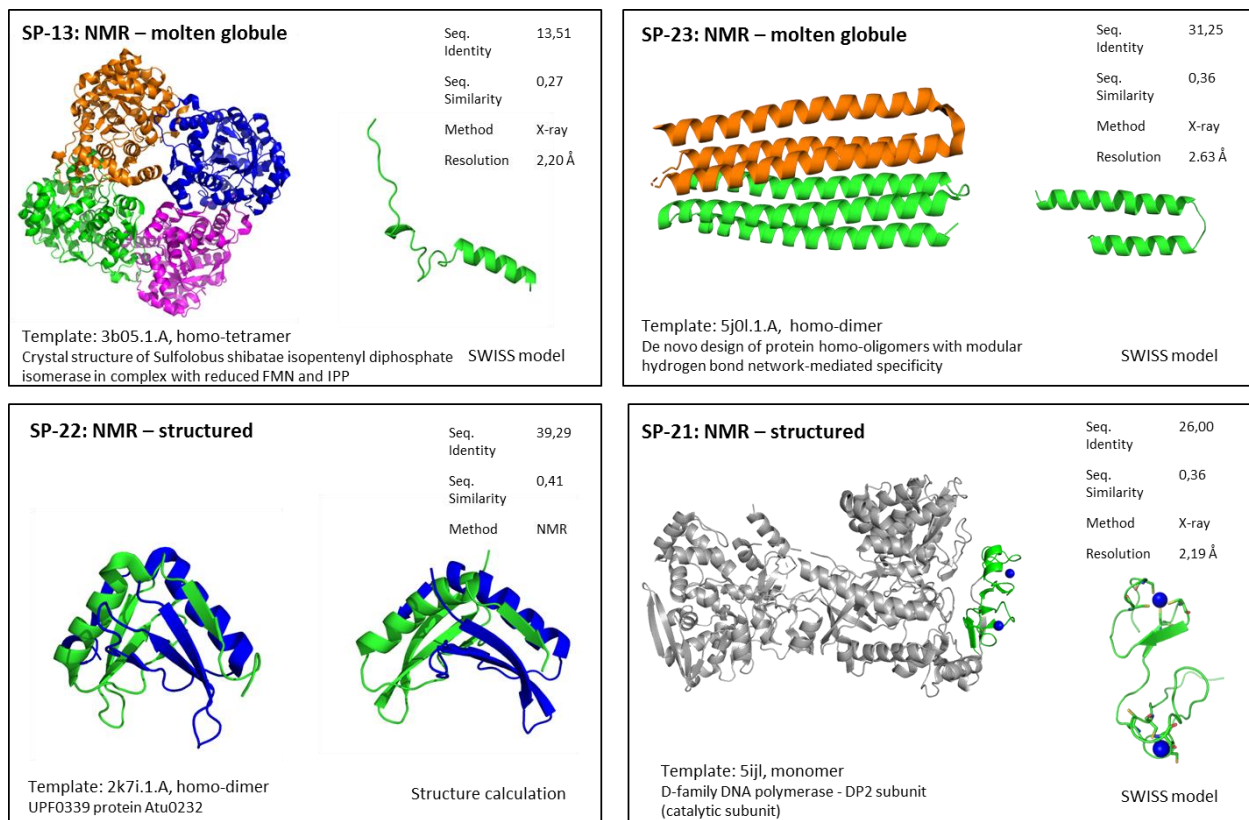

**Figure S1. Sequence-based SWISS model secondary structure predictions of small proteins** containing more than 30 residues. <sup>[37]</sup> NMR experiments report SP-13 and SP-23 to adopt molten globule states while SP-21 and SP-22 are folded. The homology model of SP-13 was based on the part of the homo-tetramer complex with low sequence identity (13.5%). The template used for the SWISS model structure of SP-23 protein is a homo-dimer complex (orange and green color represent the monomer subunits). Unlike the prediction, this small protein adopts a mixture of different conformational states, indicating lack of additional interaction partners. The SWISS homology model for SP-22 with the high sequence identity (39%) reports a symmetrical dimer formation (blue and green color represent the monomer subunits). The predicted geometry and fold are in good agreement with the NMR solution structure of SP-22. <sup>[3]</sup> Swiss model structure of the zinc binding protein SP-21 is defined using a catalytic part of DNA polymerase subunit as a template. It shows 26% of sequence identity. Almost all templates used for the SWISS model structures of small proteins, excluding the dimeric template for SP-22, are parts of big complexes, showing the important role of intra- and intermolecular interactions on the folding of the biological systems.

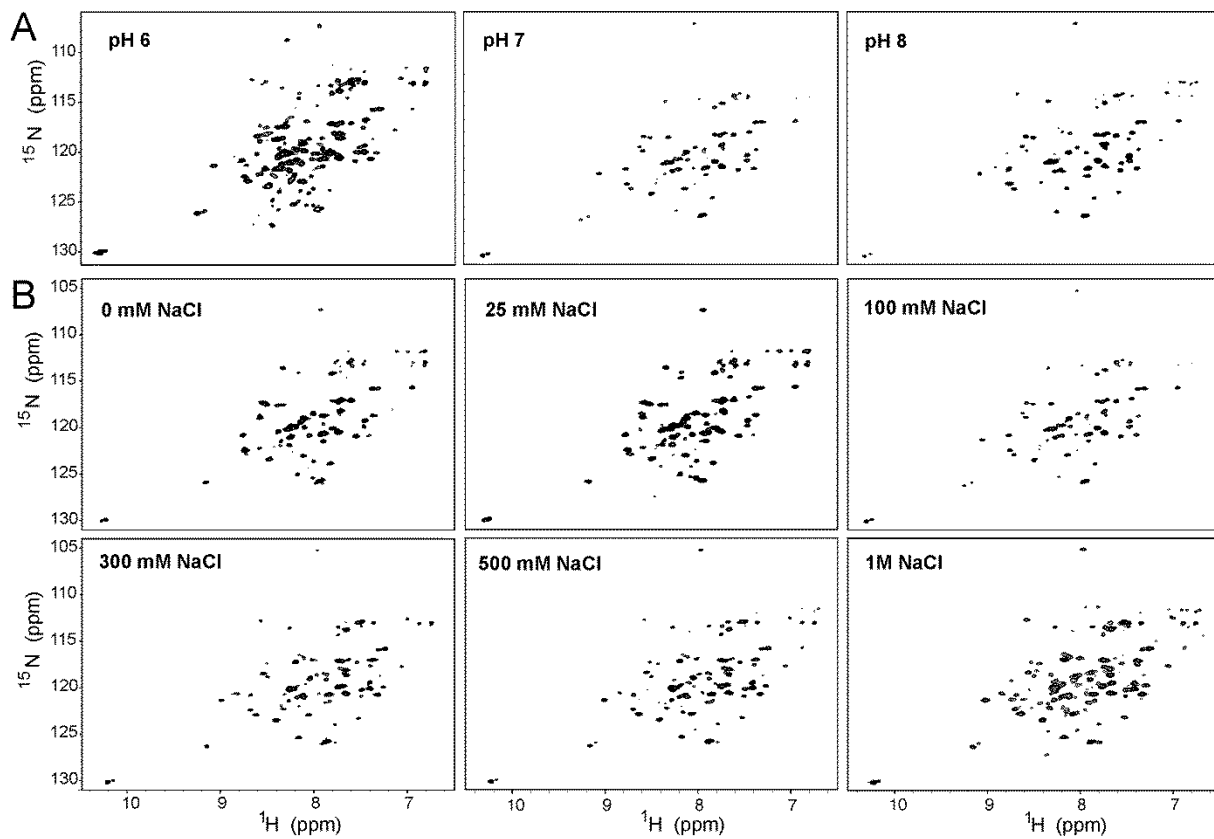

**Figure S2. Titration series of 2D  $^1\text{H}$  $^{15}\text{N}$ -HSQC spectra of SP-23 high salt regulated protein. A – pH series acquired at 100 mM NaCl. B – NaCl series acquired at pH 7. A and B are recorded at 700 MHz, 298 K, 25 mM phosphate buffer, pH and NaCl concentration as indicated in the figure.**

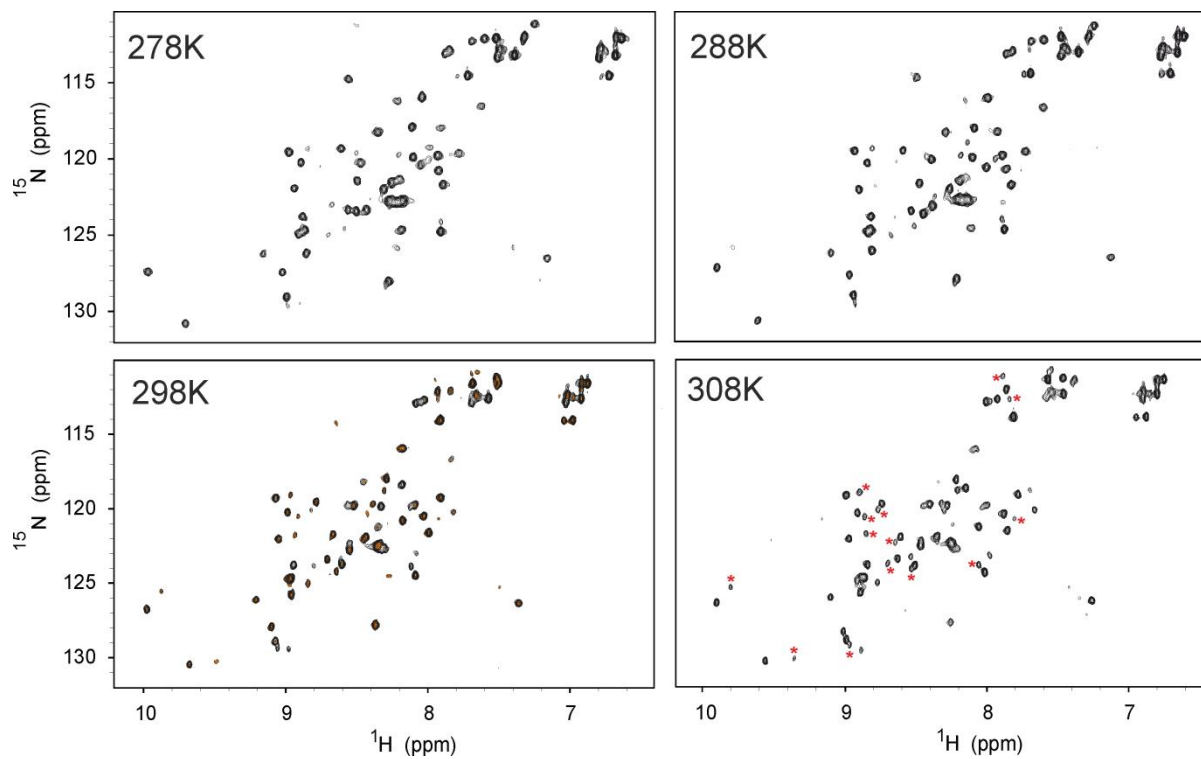

**Figure S3. Temperature series of 2D  $^1\text{H}$  $^{15}\text{N}$ -HSQC spectra of SP-21 high zinc-binding protein.**

2D  $^1\text{H}$  $^{15}\text{N}$ -HSQC temperature series from 278 to 308 K recorded at 800 MHz, 25 mM Tris pH 8, 200 mM NaCl, 3 mM DTT. The signals coming from the low populated state at 308 K are marked with red stars.

**Figure S4. FLYA assignment of SP-22 protein.**

- A. Graphical representation of automated completed FLYA<sup>[14]</sup> assignment of SP-22 with a manually determined reference assignment.<sup>[3]</sup> Green indicate the FLYA assignment in a good agreement with the reference one, red shows atoms which do not agree with the reference, blue markers represent the FLYA assignment with no reference assignment used and black color is used for the atoms assigned in the reference but not assigned by FLYA. The assignment which is not determined to be strong is highlighted in the corresponding light colors.

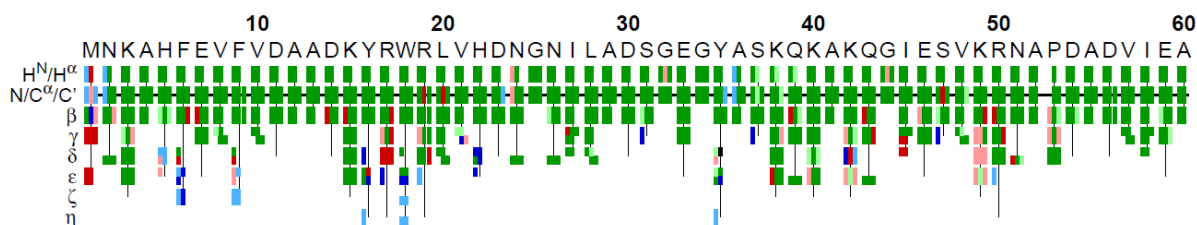

- B. Automated backbone FLYA assignment of SP-22 small protein based on spectra recorded with conventional 3D NMR methods. Total measurement time is five days. Assigned 93.15%, Score 0.751.

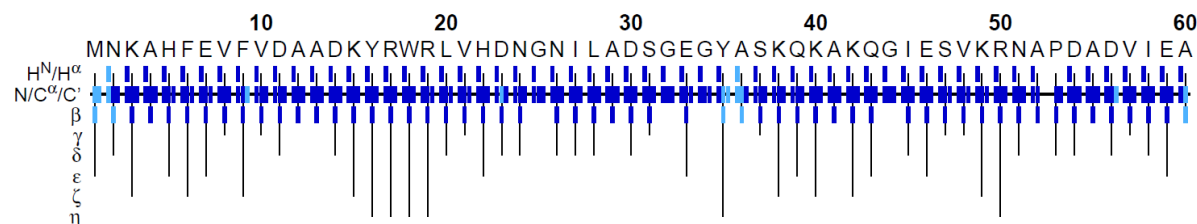

- C. Automated backbone FLYA assignment of SP-22 small protein based on spectra recoded with 6% NUS amount and processed with targeted acquisition (TA) technique. Total measurement time is 4.5 hours. Assigned 90.29%, Score 0.728.

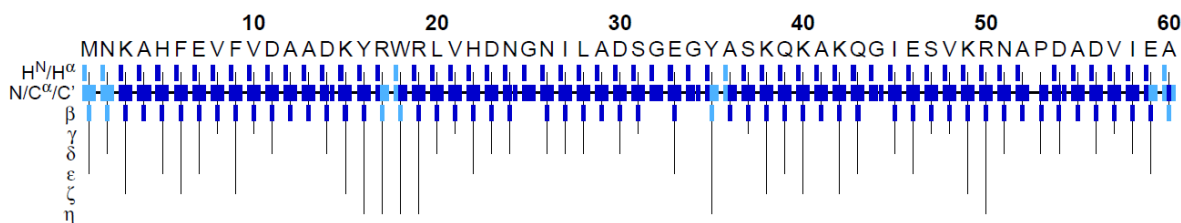

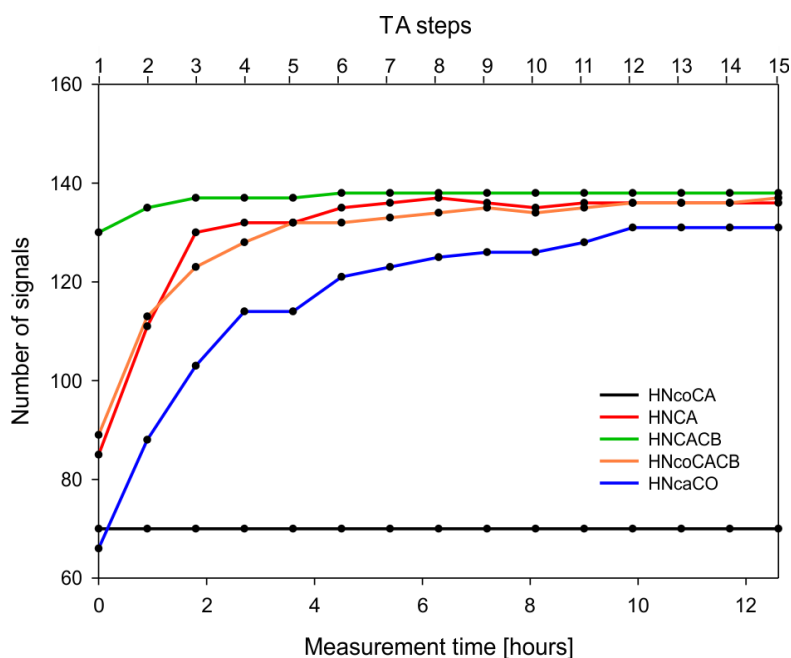

**Figure S5: Progress of targeted acquisition against measurement time of SP-22 small protein.**

The targeted acquisition in combination with the Multi-Dimensional Decomposition signal processing technique applied on non-uniform sampled data allows an enormous reduction of the NMR measurement time. <sup>[15-17]</sup> The implemented automated FLYA assignment simplifies the evaluation of the spectra and speeds up the structural screening of small proteins. The set of spectra, recorded with NUS and targeted acquisition technique, include the following 3D heteronuclear NMR experiments: HNCO, HN(CO)CA, HNCA, HN(CO)CACB, HNCACB, HN(CA)CO. Monitoring the number of signals appearing in real-time showed that after recording of 6 TA steps corresponding to 6% NUS amount, the peak amount and therefore the quality of the recorded spectra do not change significantly anymore. This allowed to stop the spectra recording after 4.5 hours of measurement time.

## Reference

- [1] J. Hahn, S. Thalmann, A. Migur, R. Freiherr von Boeselager, N. Kubatova, E. Kubareva, H. Schwalbe, E. Evguenieva-Hackenberg, *RNA Biol.* **2016**, *14*.
- [2] J. Grote, D. Krysciak, K. Petersen, S. Güllert, C. Schmeisser, K. U. Förstner, H. B. Krishnan, H. Schwalbe, N. Kubatova, W. R. Streit, *Front. Microbiol.* **2016**, *7*, 1858.
- [3] N. Kubatova, H. R. A. Jonker, K. Saxena, C. Richter, V. Vogel, S. Schreiber, A. Marchfelder, H. Schwalbe, *ChemBioChem* **2019**, 1–9.
- [4] P. Sormanni, C. Camilloni, P. Fariselli, M. Vendruscolo, *J. Mol. Biol.* **2015**, *427*, 982–996.
- [5] P. Kukic, G. T. Heller, a K. Dunker, M. Bonomi, M. Fuxreiter, R. V Pappu, P. Sormanni, Z. Dosztanyi, M. M. Babu, V. N. Uversky, *Nat. Chem. Biol.* **2017**, *13*, 339–342.
- [6] T. Ishida, K. Kinoshita, *Bioinformatics* **2008**, *24*, 1344–1348.
- [7] I. Walsh, A. J. M. Martin, T. Di domenico, S. C. E. Tosatto, *Bioinformatics* **2012**, *28*, 503–509.
- [8] M. Miskei, C. Antal, M. Fuxreiter, *Nucleic Acids Res.* **2017**, *45*, D228–D235.
- [9] N. Guex, M. C. Peitsch, T. Schwede, *Electrophoresis* **2009**, *30*, 162–173.
- [10] P. Benkert, M. Biasini, T. Schwede, *Bioinformatics* **2011**, *27*, 343–350.
- [11] M. Bertoni, F. Kiefer, M. Biasini, L. Bordoli, T. Schwede, *Sci. Rep.* **2017**, *7*, 1–15.
- [12] S. Bienert, A. Waterhouse, T. a. P. De Beer, G. Tauriello, G. Studer, L. Bordoli, T. Schwede, *Nucleic Acids Res.* **2017**, *45*, D313–D319.
- [13] A. Waterhouse, M. Bertoni, S. Bienert, G. Studer, G. Tauriello, R. Gumienny, F. T. Heer, T. a. P. De Beer, C. Rempfer, L. Bordoli, *Nucleic Acids Res.* **2018**, *46*, W296–W303.
- [14] E. Schmidt, P. Güntert, *J. Am. Chem. Soc.* **2012**, *134*, 12817–12829.
- [15] V. A. Jaravine, A. V. Zhuravleva, P. Permi, I. Ibraghimov, V. Y. Orekhov, *J. Am. Chem. Soc.* **2008**, *130*, 3927–3936.
- [16] V. Y. Orekhov, V. A. Jaravine, *Prog. Nucl. Magn. Reson. Spectrosc.* **2011**, *59*, 271–292.
- [17] L. Isaksson, M. Mayzel, M. Saline, A. Pedersen, J. Rosenlöv, B. Brutscher, B. G. Karlsson, V. Y. Orekhov, *PLoS One* **2013**, *8*, 1–8.
